# Supplementary material
Source: publisher figshare collection journal article supplement (https://tandf.figshare.com/ndownloader/files/17854829)
Supplement: Supplementary file 1 [file 17854829]

Parties’ issue strategies on the drawing board: The 2017 Austrian case

Carolina Plescia, Sylvia Kritzinger, and Patricia Oberluggauer

Online Appendix

Figure A1: Issue yield by party on the remaining 11 *positional* issues

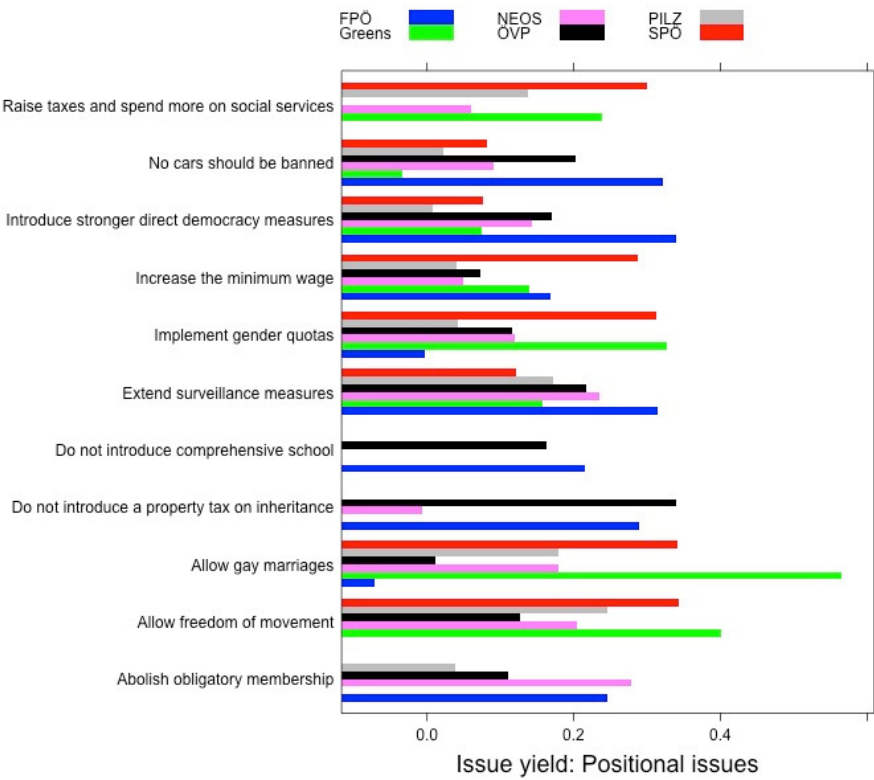

**Figure A2: Histogram of the distribution of issue emphasis in Twitter communication**

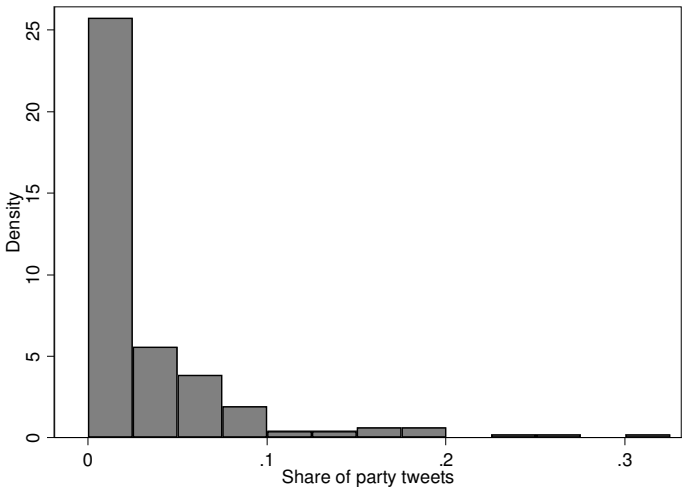

**Table A1: Explaining Twitter emphasis by party: Tobit models**

|                                                | Dependent variable: Twitter emphasis |           |
|------------------------------------------------|--------------------------------------|-----------|
|                                                | Coefficient                          | St. Error |
| Issue Yield                                    | 0.07***                              | (0.00)    |
| Systemic saliency                              | 0.04***                              | (0.00)    |
| Reference category: Greens                     |                                      |           |
| NEOS                                           | 0.02***                              | (0.00)    |
| PILZ                                           | 0.03***                              | (0.00)    |
| SPÖ                                            | -0.00***                             | (0.00)    |
| FPÖ                                            | -0.04***                             | (0.00)    |
| ÖVP                                            | -0.00***                             | (0.00)    |
| Reference category: × Issue Yield              |                                      |           |
| NEOS× Issue Yield                              | -0.03***                             | (0.00)    |
| PILZ× Issue Yield                              | 0.04***                              | (0.00)    |
| SPÖ× Issue Yield                               | -0.05***                             | (0.00)    |
| FPÖ× Issue Yield                               | 0.01***                              | (0.00)    |
| ÖVP× Issue Yield                               | -0.00***                             | (0.00)    |
| Reference category: Greens × Systemic saliency |                                      |           |
| NEOS× Systemic saliency                        | -0.01***                             | (0.00)    |
| PILZ× Systemic saliency                        | 0.00                                 | (0.00)    |
| SPÖ× Systemic saliency                         | -0.02***                             | (0.00)    |
| FPÖ× Systemic saliency                         | -0.01***                             | (0.00)    |
| ÖVP× Systemic saliency                         | -0.05***                             | (0.00)    |
| Constant                                       | 0.02***                              | (0.00)    |
| Variance (party share)                         | 0.00***                              | (0.00)    |
| <i>N</i>                                       | 186                                  |           |
| <i>AIC</i>                                     | -370.71                              |           |
| <i>BIC</i>                                     | -367.48                              |           |
| Variance Explained                             | 0.344                                |           |

Note: Standard errors in parentheses: \*  $p < 0.05$ , \*\*  $p < 0.01$ , \*\*\*  $p < 0.001$ . Note: Standard errors in parentheses: \*  $p < 0.05$ , \*\*  $p < 0.01$ , \*\*\*  $p < 0.001$ . Robust standard errors clustered by party size.  $VarExp = \frac{v_0 - v_1}{v_0}$  where  $v$  stands for the variance of the residual on the lowest level estimated by the mixed effects tobit model, index 0 indicates the empty model, and index 1 indicates the model of interest.
